# Supplementary material
Source: publisher figshare collection journal article supplement (https://sage.figshare.com/ndownloader/files/17709941)
Supplement: Supplementary file 1 [file 17709941]

**Supplemental Data File 2** – Questionnaire to assess a surrogate’s recognition that the patient may be displaying features of chronic critical illness.

The participant was asked to determine the extent to which he/she agrees with the following statements. There were 5 answer choices for each question (strongly disagree, disagree, neutral, agree, strongly agree).

| Category †                        | Question                                                                                                                                            |
|-----------------------------------|-----------------------------------------------------------------------------------------------------------------------------------------------------|
| Critical Care Medicine            | 1. There is a risk that the patient will NOT survive this hospital stay.                                                                            |
|                                   | *2. The patient will be alive one year from now.                                                                                                    |
|                                   | 3. The patient will likely have <u>new</u> health problems in the following months.                                                                 |
|                                   | 4. The patient will come back to the hospital over the next year for new health problems.                                                           |
| Respiratory Therapy               | ‡ 5. The patient requires the breathing machine (ventilator) right now to stay alive.                                                               |
|                                   | *6. The patient will be off a breathing machine next week.                                                                                          |
|                                   | ‡ 7. The patient will eventually come off the breathing machine.                                                                                    |
|                                   | 8. I understand why a tracheostomy may be recommended.                                                                                              |
| Speech and Language Pathology     | 9. The patient will have difficulty speaking for weeks to months.                                                                                   |
|                                   | 10. The patient will have difficulty eating for weeks to months.                                                                                    |
| Nutrition                         | *11. The patient has good nutrition right now.                                                                                                      |
|                                   | 12. Nutrition will play an important role in the patient’s recovery.                                                                                |
|                                   | 13. I understand why a feeding tube (PEG tube) may be recommended.                                                                                  |
| Physical and Occupational Therapy | *14. The patient is currently able to do things that require complex thinking.                                                                      |
|                                   | 15. The patient will need help moving and walking for months.                                                                                       |
|                                   | 16. The patient will need help performing activities such as bathing or grooming for months.                                                        |
|                                   | 17. The patient will go to an inpatient rehabilitation center when medically ready to leave the hospital.                                           |
|                                   | 18. Over the next year, the patient will need medical services to help him/her function independently.                                              |
| Social Services                   | ‡ 19. I understand the cost of the medical services the patient may require over the next year.                                                     |
| Palliative Care                   | 20. The patient’s pain and anxiety are being addressed by the patient’s treatment team.                                                             |
|                                   | *21. The patient will have a normal quality of life next month.                                                                                     |
|                                   | 22. The patient’s family and close friends will have health problems and depression as the patient recovers.                                        |
|                                   | 23. I will be asked to give my opinion on whether the patient would want a natural death if his/her heart stops.                                    |
|                                   | 24. I will be asked to re-address treatment goals with the care team on a regular basis to determine whether to continue life-sustaining treatment. |

\* These questions were reverse scored.

† The question category was not revealed to the surrogate

‡ When these questions were removed from the scale, the pre and post-intervention responses had greater internal consistency (Chronbach's  $\alpha > 0.70$ )
